# Supplementary material for: Age-group-specific association of oral health and systemic health on cognitive function: a cross-sectional study of Korean elders
Source: Springer Nature journal article supplement (doi:10.1186/s12903-023-03724-2), 2023-12-13
Supplement: MOESM1 [file 26524368]

**Supplementary Information containing Tables S1-S4.**

## **Age-group-specific association of oral health and systemic health on cognitive function: a cross-sectional study of Korean elders**

Jae-Eun Sin<sup>1</sup>, Hye-Sung Kim<sup>1,2</sup>, Inseong Hwang<sup>3</sup>, Miwha Noh<sup>2</sup>

<sup>1</sup> Apple Tree Institute of Biomedical Science, Apple Tree Medical Foundation, 1450 Jungang-ro, Goyang-si, Gyeonggi-do, Republic of Korea

<sup>2</sup> Apple Tree Dental Hospital, Apple Tree Medical Foundation, 1450 Jungang-ro, Goyang-si, Gyeonggi-do, Republic of Korea

<sup>3</sup> DOCSmedi OralBiome Co., Ltd., 143 Gangseong-ro, Goyang-si, Gyeonggi-do, Republic of Korea

### **Correspondence**

Inseong Hwang, DOCSmedi OralBiome Co., Ltd., 143 Gangseong-ro, Goyang-si, Gyeonggi-do, Republic of Korea.

Email: inseong.hwang@gmail.com

Miwha Noh, Apple Tree Medical Foundation, 1450 Jungang-ro, Goyang-si, Gyeonggi-do, Republic of Korea

Email: miwaha6708@naver.com

<Table S1> Result of the correlation analysis between oral health, general health, and cognitive function.

|                              | Number of functional<br>teeth | Masticatory ability | GOHAI   |
|------------------------------|-------------------------------|---------------------|---------|
| Age                          | -.47***                       | -.45***             | -.31*** |
| Sex                          | -.03*                         | -.03*               | -.03**  |
| Education level              | .35***                        | .33***              | .25***  |
| Marital status               | .24***                        | .21***              | .18***  |
| Residence                    | .06***                        | .08***              | .03**   |
| Hypertension                 | -.20***                       | -.20***             | -.15*** |
| Diabetes mellitus            | -.14***                       | -.16***             | -.13*** |
| Cancer and malignant tumours | n.s.                          | -.04**              | n.s.    |
| Lung disease                 | -.07***                       | -.05***             | -.05*** |
| Liver disease                | n.s.                          | n.s.                | n.s.    |
| Heart disease                | -.10***                       | -.11***             | -.09*** |
| Cerebrovascular disease      | -.10***                       | -.12***             | -.08*** |
| Psychiatric disease          | -.07***                       | -.07***             | -.07*** |
| Rheumatoid arthritis         | -.22***                       | -.22***             | -.16*** |
| Digestive disorder           | n.s.                          | -.05***             | n.s.    |
| Number of chronic diseases   | -.25***                       | -.30***             | -.22*** |
| Alcohol use                  | .12***                        | .12***              | .09***  |
| Smoking                      | n.s.                          | n.s.                | n.s.    |
| Depressive symptom           | -.15***                       | -.20***             | -.28*** |
| Self-rated health status     | .30***                        | .45***              | .30***  |
| Cognitive function           | .38***                        | .42***              | .34***  |

\*  $p < .05$ , \*\*  $p < .01$ , \*\*\*  $p < .001$

<Table S2> Result of Hierarchical Regression Analysis of Age Group (<65).

|                                    | Model 1            |           |          | Model 2             |           |          | Model 3             |           |          | Model 4             |           |          |      |
|------------------------------------|--------------------|-----------|----------|---------------------|-----------|----------|---------------------|-----------|----------|---------------------|-----------|----------|------|
|                                    | <i>B</i>           | <i>SE</i> | <i>t</i> | <i>B</i>            | <i>SE</i> | <i>t</i> | <i>B</i>            | <i>SE</i> | <i>t</i> | <i>B</i>            | <i>SE</i> | <i>t</i> | VIF  |
| Number of functional teeth         | 0.01               | 0.01      | 0.95     | 0.00                | 0.01      | 0.06     | 0.00                | 0.01      | -0.06    | 0.00                | 0.01      | -0.01    | 1.10 |
| Masticatory ability                | 0.76               | 0.10      | 7.77***  | 0.63                | 0.10      | 6.61***  | 0.63                | 0.10      | 6.54***  | 0.41                | 0.10      | 4.21***  | 1.41 |
| GOHAI                              | 0.06               | 0.01      | 4.87***  | 0.05                | 0.01      | 4.57***  | 0.05                | 0.01      | 4.32***  | 0.03                | 0.01      | 2.65**   | 1.31 |
| Age                                |                    |           |          | -0.03               | 0.03      | -1.02    | -0.01               | 0.03      | -0.32    | -0.01               | 0.03      | -0.53    | 1.18 |
| Sex (ref = male)                   |                    |           |          | -0.10               | 0.13      | -0.77    | -0.05               | 0.18      | -0.26    | -0.05               | 0.18      | -0.27    | 2.28 |
| Education level (ref = elementary) |                    |           |          |                     |           |          |                     |           |          |                     |           |          | 1.38 |
| middle school                      |                    |           |          | 0.96                | 0.24      | 3.90***  | 0.90                | 0.25      | 3.68***  | 0.90                | 0.24      | 3.75***  |      |
| high school                        |                    |           |          | 1.57                | 0.22      | 7.28***  | 1.43                | 0.22      | 6.60***  | 1.39                | 0.21      | 6.58***  |      |
| college                            |                    |           |          | 1.82                | 0.25      | 7.36***  | 1.67                | 0.25      | 6.71***  | 1.64                | 0.24      | 6.75***  |      |
| Marital status (ref = unmarried)   |                    |           |          |                     |           |          |                     |           |          |                     |           |          | 1.15 |
| widowed                            |                    |           |          | 1.34                | 0.54      | 2.47*    | 1.41                | 0.54      | 2.61**   | 1.24                | 0.53      | 2.35*    |      |
| divorced                           |                    |           |          | 1.69                | 0.56      | 3.02**   | 1.72                | 0.56      | 3.08**   | 1.75                | 0.54      | 3.23**   |      |
| living apart together              |                    |           |          | 0.45                | 0.87      | 0.52     | 0.57                | 0.87      | 0.65     | 0.32                | 0.84      | 0.38     |      |
| married                            |                    |           |          | 1.54                | 0.47      | 3.26**   | 1.58                | 0.47      | 3.34***  | 1.42                | 0.46      | 3.09**   |      |
| Area of residence (ref = township) |                    |           |          |                     |           |          |                     |           |          |                     |           |          | 1.14 |
| small city                         |                    |           |          | -0.09               | 0.18      | -0.52    | -0.07               | 0.18      | -0.40    | 0.00                | 0.18      | -0.01    |      |
| big city                           |                    |           |          | 0.42                | 0.18      | 2.38*    | 0.42                | 0.18      | 2.38*    | 0.33                | 0.17      | 1.91     |      |
| Chronic disease                    |                    |           |          |                     |           |          |                     |           |          |                     |           |          |      |
| hypertension                       |                    |           |          |                     |           |          | -0.02               | 0.14      | -0.15    | 0.05                | 0.14      | 0.39     | 1.12 |
| diabetes mellitus                  |                    |           |          |                     |           |          | 0.08                | 0.20      | 0.42     | 0.15                | 0.20      | 0.77     | 1.09 |
| cancer or malignant tumours        |                    |           |          |                     |           |          | -0.06               | 0.28      | -0.23    | 0.14                | 0.27      | 0.52     | 1.06 |
| lung disease                       |                    |           |          |                     |           |          | -0.01               | 0.59      | -0.01    | 0.08                | 0.58      | 0.15     | 1.02 |
| liver disease                      |                    |           |          |                     |           |          | 0.20                | 0.43      | 0.47     | 0.27                | 0.42      | 0.64     | 1.03 |
| heart disease                      |                    |           |          |                     |           |          | -0.53               | 0.31      | -1.69    | -0.38               | 0.31      | -1.23    | 1.04 |
| cerebrovascular disease            |                    |           |          |                     |           |          | -1.26               | 0.45      | -2.79**  | -0.77               | 0.44      | -1.74    | 1.08 |
| psychiatric disease                |                    |           |          |                     |           |          | -0.54               | 0.43      | -1.26    | -0.23               | 0.42      | -0.54    | 1.06 |
| rheumatoid arthritis               |                    |           |          |                     |           |          | -0.50               | 0.22      | -2.28*   | -0.40               | 0.21      | -1.86    | 1.11 |
| digestive disorder                 |                    |           |          |                     |           |          | 0.34                | 0.59      | 0.58     | 0.51                | 0.58      | 0.89     | 1.02 |
| Alcohol use (ref = never)          |                    |           |          |                     |           |          |                     |           |          |                     |           |          | 1.38 |
| former                             |                    |           |          |                     |           |          | -0.55               | 0.19      | -2.92**  | -0.47               | 0.18      | -2.58**  |      |
| current                            |                    |           |          |                     |           |          | 0.10                | 0.15      | 0.65     | 0.10                | 0.14      | 0.68     |      |
| Smoking (ref = never)              |                    |           |          |                     |           |          |                     |           |          |                     |           |          | 2.11 |
| former                             |                    |           |          |                     |           |          | -0.10               | 0.20      | -0.49    | -0.16               | 0.19      | -0.83    |      |
| current                            |                    |           |          |                     |           |          | 0.10                | 0.24      | 0.43     | 0.01                | 0.23      | 0.03     |      |
| Depressive symptom                 |                    |           |          |                     |           |          |                     |           |          | -0.34               | 0.04      | -8.91*** | 1.13 |
| Self-rated health status           |                    |           |          |                     |           |          |                     |           |          | 0.48                | 0.09      | 5.01***  | 1.29 |
| <i>F</i>                           | 49.55 (3, 1938)*** |           |          | 20.30 (14, 1927)*** |           |          | 11.63 (28, 1913)*** |           |          | 15.14 (30, 1911)*** |           |          |      |
| <i>R</i> <sup>2</sup>              | .07                |           |          | .13                 |           |          | .15                 |           |          | .19                 |           |          |      |
| <i>R</i> <sup>2</sup> adjusted     | .07                |           |          | .12                 |           |          | .13                 |           |          | .18                 |           |          |      |
| $\Delta R^2$                       |                    |           |          | .06                 |           |          | .02                 |           |          | .05                 |           |          |      |

\*  $p < .05$ , \*\*  $p < .01$ , \*\*\*  $p < .001$

<Table S3> Result of Hierarchical Regression Analysis of Age Group (65-74).

|                                    | Model 1            |           |          | Model 2             |           |          | Model 3             |           |          | Model 4             |           |           |      |
|------------------------------------|--------------------|-----------|----------|---------------------|-----------|----------|---------------------|-----------|----------|---------------------|-----------|-----------|------|
|                                    | <i>B</i>           | <i>SE</i> | <i>t</i> | <i>B</i>            | <i>SE</i> | <i>t</i> | <i>B</i>            | <i>SE</i> | <i>t</i> | <i>B</i>            | <i>SE</i> | <i>t</i>  | VIF  |
| Number of functional teeth         | 0.03               | 0.01      | 2.38*    | 0.01                | 0.01      | 0.63     | 0.01                | 0.01      | 0.47     | 0.00                | 0.01      | -0.17     | 1.25 |
| Masticatory ability                | 0.87               | 0.14      | 6.41***  | 0.69                | 0.13      | 5.28***  | 0.62                | 0.13      | 4.74***  | 0.39                | 0.13      | 3.07**    | 1.49 |
| GOHAI                              | 0.08               | 0.02      | 5.15***  | 0.08                | 0.02      | 5.08***  | 0.07                | 0.02      | 4.96***  | 0.03                | 0.01      | 2.36*     | 1.31 |
| Age                                |                    |           |          | -0.15               | 0.03      | -4.95*** | -0.12               | 0.03      | -4.07*** | -0.14               | 0.03      | -4.71***  | 1.13 |
| Sex (ref = male)                   |                    |           |          | -0.39               | 0.19      | -2.11*   | -0.29               | 0.28      | -1.04    | -0.41               | 0.26      | -1.55     | 2.75 |
| Education level (ref = elementary) |                    |           |          |                     |           |          |                     |           |          |                     |           |           | 1.38 |
| middle school                      |                    |           |          | 1.57                | 0.24      | 6.66***  | 1.40                | 0.24      | 5.94***  | 1.19                | 0.22      | 5.33***   |      |
| high school                        |                    |           |          | 1.95                | 0.23      | 8.60***  | 1.73                | 0.23      | 7.58***  | 1.43                | 0.22      | 6.60***   |      |
| college                            |                    |           |          | 2.27                | 0.32      | 7.11***  | 1.95                | 0.32      | 6.06***  | 1.71                | 0.30      | 5.62***   |      |
| Marital status (ref = unmarried)   |                    |           |          |                     |           |          |                     |           |          |                     |           |           | 1.23 |
| widowed                            |                    |           |          | 0.03                | 1.02      | 0.03     | 0.01                | 1.02      | 0.01     | -0.05               | 0.96      | -0.06     |      |
| divorced                           |                    |           |          | -0.49               | 1.13      | -0.43    | -0.39               | 1.12      | -0.35    | -0.40               | 1.06      | -0.38     |      |
| living apart together              |                    |           |          | 1.06                | 1.40      | 0.76     | 1.26                | 1.40      | 0.9      | 0.93                | 1.32      | 0.71      |      |
| married                            |                    |           |          | 0.22                | 1.00      | 0.22     | 0.19                | 1.00      | 0.19     | 0.07                | 0.94      | 0.07      |      |
| Area of residence (ref = township) |                    |           |          |                     |           |          |                     |           |          |                     |           |           | 1.08 |
| small city                         |                    |           |          | 0.09                | 0.23      | 0.39     | 0.17                | 0.23      | 0.76     | 0.44                | 0.22      | 2.02*     |      |
| big city                           |                    |           |          | 0.65                | 0.22      | 2.90**   | 0.75                | 0.22      | 3.38***  | 0.81                | 0.21      | 3.88***   |      |
| Chronic disease                    |                    |           |          |                     |           |          |                     |           |          |                     |           |           |      |
| hypertension                       |                    |           |          |                     |           |          | -0.34               | 0.18      | -1.94    | -0.20               | 0.17      | -1.18     | 1.12 |
| diabetes mellitus                  |                    |           |          |                     |           |          | 0.04                | 0.21      | 0.2      | 0.15                | 0.20      | 0.78      | 1.10 |
| cancer or malignant tumours        |                    |           |          |                     |           |          | -0.09               | 0.30      | -0.31    | 0.33                | 0.29      | 1.15      | 1.05 |
| lung disease                       |                    |           |          |                     |           |          | -0.24               | 0.57      | -0.43    | 0.16                | 0.54      | 0.29      | 1.03 |
| liver disease                      |                    |           |          |                     |           |          | -0.29               | 0.45      | -0.65    | -0.30               | 0.43      | -0.7      | 1.02 |
| heart disease                      |                    |           |          |                     |           |          | -0.04               | 0.30      | -0.15    | 0.04                | 0.29      | 0.16      | 1.05 |
| cerebrovascular disease            |                    |           |          |                     |           |          | -1.85               | 0.36      | -5.10*** | -1.29               | 0.35      | -3.72***  | 1.08 |
| psychiatric disease                |                    |           |          |                     |           |          | -0.52               | 0.37      | -1.4     | 0.10                | 0.35      | 0.29      | 1.10 |
| rheumatoid arthritis               |                    |           |          |                     |           |          | -0.68               | 0.21      | -3.18**  | -0.48               | 0.20      | -2.36*    | 1.21 |
| digestive disorder                 |                    |           |          |                     |           |          | 0.67                | 0.68      | 0.99     | 0.84                | 0.64      | 1.31      | 1.01 |
| Alcohol use (ref = never)          |                    |           |          |                     |           |          |                     |           |          |                     |           |           | 1.58 |
| former                             |                    |           |          |                     |           |          | -0.41               | 0.25      | -1.69    | -0.42               | 0.23      | -1.81     |      |
| current                            |                    |           |          |                     |           |          | 0.29                | 0.23      | 1.3      | 0.19                | 0.21      | 0.91      |      |
| Smoking (ref = never)              |                    |           |          |                     |           |          |                     |           |          |                     |           |           | 2.26 |
| former                             |                    |           |          |                     |           |          | -0.16               | 0.27      | -0.6     | -0.13               | 0.26      | -0.52     |      |
| current                            |                    |           |          |                     |           |          | 0.19                | 0.35      | 0.54     | 0.07                | 0.33      | 0.2       |      |
| Depressive symptom                 |                    |           |          |                     |           |          |                     |           |          | -0.62               | 0.05      | -12.70*** | 1.12 |
| Self-rated health status           |                    |           |          |                     |           |          |                     |           |          | 0.85                | 0.12      | 7.17***   | 1.31 |
| <i>F</i>                           | 51.56 (3, 1919)*** |           |          | 26.36 (14, 1908)*** |           |          | 15.98 (28, 1894)*** |           |          | 24.32 (30, 1892)*** |           |           |      |
| <i>R</i> <sup>2</sup>              | .07                |           |          | .16                 |           |          | .19                 |           |          | .28                 |           |           |      |
| <i>R</i> <sup>2</sup> adjusted     | .07                |           |          | .16                 |           |          | .18                 |           |          | .27                 |           |           |      |
| $\Delta R^2$                       |                    |           |          | .09                 |           |          | .03                 |           |          | .09                 |           |           |      |

\*  $p < .05$ , \*\*  $p < .01$ , \*\*\*  $p < .001$

<Table S4> Result of Hierarchical Regression Analysis of Age Group ( $\geq 75$ ).

|                                    | Model 1             |           |          | Model 2             |           |           | Model 3             |           |           | Model 4             |           |           |      |
|------------------------------------|---------------------|-----------|----------|---------------------|-----------|-----------|---------------------|-----------|-----------|---------------------|-----------|-----------|------|
|                                    | <i>B</i>            | <i>SE</i> | <i>t</i> | <i>B</i>            | <i>SE</i> | <i>t</i>  | <i>B</i>            | <i>SE</i> | <i>t</i>  | <i>B</i>            | <i>SE</i> | <i>t</i>  | VIF  |
| Number of functional teeth         | 0.09                | 0.01      | 7.07***  | 0.05                | 0.01      | 4.34***   | 0.05                | 0.01      | 3.98***   | 0.04                | 0.01      | 3.62***   | 1.23 |
| Masticatory ability                | 1.40                | 0.19      | 7.48***  | 0.99                | 0.17      | 5.71***   | 0.91                | 0.17      | 5.29***   | 0.60                | 0.16      | 3.68***   | 1.50 |
| GOHAI                              | 0.13                | 0.02      | 6.74***  | 0.09                | 0.02      | 5.38***   | 0.08                | 0.02      | 4.99***   | 0.02                | 0.02      | 1.29      | 1.35 |
| Age                                |                     |           |          | -0.37               | 0.03      | -13.86*** | -0.35               | 0.03      | -13.30*** | -0.32               | 0.02      | -12.66*** | 1.27 |
| Sex (ref = male)                   |                     |           |          | -1.50               | 0.30      | -4.95***  | -1.76               | 0.42      | -4.23***  | -1.75               | 0.39      | -4.49***  | 3.01 |
| Education level (ref = elementary) |                     |           |          |                     |           |           |                     |           |           |                     |           |           | 1.44 |
| middle school                      |                     |           |          | 1.78                | 0.38      | 4.66***   | 1.71                | 0.38      | 4.54***   | 1.50                | 0.35      | 4.26***   |      |
| high school                        |                     |           |          | 2.27                | 0.37      | 6.16***   | 2.16                | 0.37      | 5.91***   | 1.86                | 0.34      | 5.43***   |      |
| college                            |                     |           |          | 3.21                | 0.54      | 6.00***   | 3.12                | 0.53      | 5.84***   | 2.61                | 0.50      | 5.20***   |      |
| Marital status (ref = unmarried)   |                     |           |          |                     |           |           |                     |           |           |                     |           |           | 1.58 |
| widowed                            |                     |           |          | -1.77               | 2.46      | -0.72     | -2.62               | 2.45      | -1.07     | -1.21               | 2.29      | -0.53     |      |
| divorced                           |                     |           |          | -2.26               | 2.67      | -0.85     | -2.67               | 2.66      | -1.01     | -0.84               | 2.48      | -0.34     |      |
| living apart together              |                     |           |          | -2.00               | 3.47      | -0.58     | -1.99               | 3.45      | -0.58     | -0.82               | 3.22      | -0.25     |      |
| married                            |                     |           |          | -1.78               | 2.46      | -0.72     | -2.57               | 2.45      | -1.05     | -1.16               | 2.29      | -0.51     |      |
| Area of residence (ref = township) |                     |           |          |                     |           |           |                     |           |           |                     |           |           | 1.11 |
| small city                         |                     |           |          | 0.00                | 0.31      | 0         | 0.14                | 0.31      | 0.45      | 0.50                | 0.29      | 1.74      |      |
| big city                           |                     |           |          | 0.48                | 0.30      | 1.59      | 0.58                | 0.30      | 1.95      | 0.55                | 0.28      | 1.99*     |      |
| Chronic disease                    |                     |           |          |                     |           |           |                     |           |           |                     |           |           |      |
| hypertension                       |                     |           |          |                     |           |           | -0.18               | 0.26      | -0.71     | -0.08               | 0.24      | -0.33     | 1.12 |
| diabetes mellitus                  |                     |           |          |                     |           |           | 0.03                | 0.27      | 0.11      | 0.16                | 0.25      | 0.65      | 1.10 |
| cancer or malignant tumours        |                     |           |          |                     |           |           | -0.01               | 0.41      | -0.04     | 0.61                | 0.39      | 1.58      | 1.04 |
| lung disease                       |                     |           |          |                     |           |           | -0.16               | 0.56      | -0.29     | -0.49               | 0.52      | -0.94     | 1.04 |
| liver disease                      |                     |           |          |                     |           |           | -0.97               | 0.73      | -1.33     | -1.06               | 0.68      | -1.54     | 1.02 |
| heart disease                      |                     |           |          |                     |           |           | -0.19               | 0.32      | -0.58     | 0.12                | 0.30      | 0.41      | 1.05 |
| cerebrovascular disease            |                     |           |          |                     |           |           | -2.24               | 0.41      | -5.44***  | -1.52               | 0.39      | -3.92***  | 1.06 |
| psychiatric disease                |                     |           |          |                     |           |           | -0.63               | 0.48      | -1.33     | 0.08                | 0.45      | 0.19      | 1.04 |
| rheumatoid arthritis               |                     |           |          |                     |           |           | -0.63               | 0.26      | -2.41*    | -0.20               | 0.25      | -0.79     | 1.24 |
| digestive disorder                 |                     |           |          |                     |           |           | 0.21                | 0.82      | 0.26      | 0.72                | 0.77      | 0.94      | 1.02 |
| Alcohol use (ref = never)          |                     |           |          |                     |           |           |                     |           |           |                     |           |           | 1.81 |
| former                             |                     |           |          |                     |           |           | -0.66               | 0.34      | -1.98*    | -0.40               | 0.31      | -1.26     |      |
| current                            |                     |           |          |                     |           |           | 0.92                | 0.40      | 2.33*     | 0.39                | 0.37      | 1.06      |      |
| Smoking (ref = never)              |                     |           |          |                     |           |           |                     |           |           |                     |           |           | 1.90 |
| former                             |                     |           |          |                     |           |           | -0.70               | 0.36      | -1.93     | -0.75               | 0.34      | -2.20*    |      |
| current                            |                     |           |          |                     |           |           | -0.68               | 0.68      | -0.99     | -0.90               | 0.64      | -1.41     |      |
| Depressive symptom                 |                     |           |          |                     |           |           |                     |           |           | -0.81               | 0.06      | -12.70*** | 1.16 |
| Self-rated health status           |                     |           |          |                     |           |           |                     |           |           | 1.34                | 0.15      | 7.17***   | 1.36 |
| <i>F</i>                           | 110.10 (3, 2106)*** |           |          | 58.98 (14, 2095)*** |           |           | 32.92 (28, 2081)*** |           |           | 45.64 (30, 2079)*** |           |           |      |
| <i>R</i> <sup>2</sup>              | .14                 |           |          | .28                 |           |           | .31                 |           |           | .40                 |           |           |      |
| <i>R</i> <sup>2</sup> adjusted     | .13                 |           |          | .28                 |           |           | .30                 |           |           | .39                 |           |           |      |
| $\Delta R^2$                       |                     |           |          | .15                 |           |           | .02                 |           |           | .09                 |           |           |      |

\*  $p < .05$ , \*\*  $p < .01$ , \*\*\*  $p < .001$
